# Supplementary material
Source: publisher figshare collection journal article supplement (https://future-science-group.figshare.com/ndownloader/files/31592522)
Supplement: Supplementary file 3 [file 31592522]

A

|                          |                          |                          |                          |                          |                          |                        |                   |                          |                          |                          |                          |
|--------------------------|--------------------------|--------------------------|--------------------------|--------------------------|--------------------------|------------------------|-------------------|--------------------------|--------------------------|--------------------------|--------------------------|
| <1% niv+ipi              | 1.13 (0.86, 1.46)        | 0.93 (0.58, 1.51)        | 1.02 (0.75, 1.4)         | 0.97 (0.67, 1.41)        | 0.93 (0.66, 1.31)        | 1.00 (0.58, 1.71)      | 1.30 (0.88, 1.86) | 1.41 (0.92, 2.16)        | 1.17 (0.82, 1.64)        | 0.91 (0.57, 1.48)        | <b>1.50 (1.15, 1.96)</b> |
| 1.01 (0.79, 1.28)        | <1% plaCT+ICI            | 0.82 (0.54, 1.28)        | 0.90 (0.73, 1.14)        | 0.86 (0.64, 1.17)        | 0.82 (0.63, 1.09)        | 0.89 (0.54, 1.46)      | 1.15 (0.85, 1.54) | 1.25 (0.88, 1.83)        | 1.04 (0.79, 1.35)        | 0.81 (0.53, 1.26)        | <b>1.33 (1.16, 1.55)</b> |
| 1.00 (0.64, 1.55)        | <1%<br>plaCT+niv+ipi     |                          | 1.10 (0.71, 1.70)        | 1.04 (0.64, 1.68)        | 1.00 (0.62, 1.60)        | 1.08 (0.57, 2.00)      | 1.40 (0.85, 2.23) | 1.52 (0.9, 2.59)         | 1.26 (0.78, 1.98)        | 0.99 (0.56, 1.75)        | <b>1.62 (1.08, 2.42)</b> |
| 1.03 (0.77, 1.36)        |                          | 1.03 (0.69, 1.53)        | ≥50%: ICI                | 0.94 (0.73, 1.23)        | 0.91 (0.68, 1.20)        | 0.98 (0.59, 1.60)      | 1.27 (0.92, 1.70) | 1.38 (0.95, 2.01)        | 1.14 (0.85, 1.49)        | 0.89 (0.58, 1.39)        | <b>1.47 (1.24, 1.73)</b> |
| 1.21 (0.85, 1.70)        |                          | 1.22 (0.78, 1.89)        | 1.18 (0.93, 1.50)        | ≥50%: niv+ipi            | 0.96 (0.68, 1.36)        | 1.04 (0.60, 1.77)      | 1.34 (0.91, 1.91) | 1.47 (0.96, 2.25)        | 1.21 (0.84, 1.69)        | 0.95 (0.58, 1.53)        | <b>1.55 (1.19, 2.01)</b> |
| <b>1.71 (1.26, 2.31)</b> | <b>1.70 (1.37, 2.09)</b> | <b>1.71 (1.15, 2.58)</b> | <b>1.66 (1.32, 2.11)</b> | <b>1.41 (1.05, 1.90)</b> | ≥50%:<br>plaCT+ICI       | 1.08 (0.63, 1.82)      | 1.40 (0.98, 1.96) | <b>1.53 (1.02, 2.30)</b> | 1.26 (0.90, 1.74)        | 0.99 (0.62, 1.57)        | <b>1.62 (1.29, 2.05)</b> |
| 1.16 (0.71, 1.91)        | 1.16 (0.74, 1.81)        | 1.17 (0.66, 2.06)        | 1.14 (0.72, 1.80)        | 0.96 (0.59, 1.58)        | 0.68 (0.43, 1.08)        | ≥50%:<br>plaCT+niv+ipi | 1.30 (0.75, 2.21) | 1.41 (0.80, 2.54)        | 1.17 (0.69, 1.97)        | 0.91 (0.49, 1.70)        | 1.50 (0.94, 2.43)        |
| NA                       | NA                       | NA                       | NA                       | NA                       | NA                       | NA                     | 1-49%: ICI        | 1.09 (0.72, 1.70)        | 0.90 (0.61, 1.27)        | 0.71 (0.44, 1.16)        | 1.16 (0.90, 1.53)        |
| NA                       | NA                       | NA                       | NA                       | NA                       | NA                       | NA                     | NA                | 1-49%: niv+ipi           | 0.83 (0.54, 1.22)        | 0.65 (0.38, 1.09)        | 1.06 (0.75, 1.48)        |
| 1.19 (0.88, 1.59)        | 1.18 (0.97, 1.44)        | 1.19 (0.81, 1.80)        | 1.16 (0.93, 1.45)        | 0.98 (0.73, 1.32)        | <b>0.70 (0.55, 0.85)</b> | 1.02 (0.65, 1.61)      | NA                | NA                       | 1-49%:<br>plaCT+ICI      | 0.78 (0.49, 1.25)        | <b>1.28 (1.03, 1.63)</b> |
| 1.03 (0.65, 1.60)        | 1.02 (0.68, 1.51)        | 1.03 (0.61, 1.74)        | 1.00 (0.67, 1.50)        | 0.85 (0.54, 1.33)        | <b>0.60 (0.40, 0.91)</b> | 0.88 (0.50, 1.57)      | NA                | NA                       | 0.86 (0.57, 1.29)        | 1-49%:<br>plaCT+niv+ipi  | <b>1.64 (1.09, 2.46)</b> |
| <b>0.71 (0.55, 0.90)</b> | <b>0.70 (0.62, 0.79)</b> | 0.71 (0.49, 1.03)        | <b>0.69 (0.59, 0.80)</b> | <b>0.58 (0.46, 0.74)</b> | <b>0.41 (0.35, 0.50)</b> | 0.61 (0.40, 0.94)      | NA                | NA                       | <b>0.59 (0.51, 0.70)</b> | <b>0.69 (0.47, 1.00)</b> | plaCT                    |

B

|                          |                   |                          |                          |                          |                          |
|--------------------------|-------------------|--------------------------|--------------------------|--------------------------|--------------------------|
| ≥50%: ICI                | 1.29 (0.89, 1.78) | <b>1.50 (1.24, 1.80)</b> | 1.12 (0.84, 1.49)        | 0.88 (0.65, 1.2)         | 1.26 (0.92, 1.66)        |
| NA                       | 1-49%: ICI        |                          | 1.16 (0.89, 1.58)        | 0.87 (0.62, 1.27)        | 0.69 (0.48, 1.02)        |
| <b>0.69 (0.49, 0.98)</b> | NA                | chemotherapy             | <b>0.75 (0.60, 0.93)</b> | <b>0.59 (0.47, 0.75)</b> | 0.84 (0.66, 1.04)        |
| 0.76 (0.47, 1.28)        | NA                | 1.10 (0.78, 1.60)        | Prior+chem<br><1%: ICI   | 0.79 (0.57, 1.10)        | 1.12 (0.81, 1.52)        |
| 1.25 (0.68, 2.35)        | NA                | <b>1.82 (1.10, 3.03)</b> | 1.66 (0.88, 3.05)        | Prior+chem<br>≥50%: ICI  | <b>1.42 (1.00, 1.95)</b> |
| 0.89 (0.39, 2.06)        | NA                | 1.30 (0.61, 2.73)        | 1.18 (0.51, 2.69)        | 0.71 (0.29, 1.74)        | Prior+chem<br>1-49%: ICI |

C

|                          |                          |                          |                         |                          |                          |                          |                   |                         |                         |                          |
|--------------------------|--------------------------|--------------------------|-------------------------|--------------------------|--------------------------|--------------------------|-------------------|-------------------------|-------------------------|--------------------------|
| <1% niv+ipi              | 1.12 (0.82, 1.52)        | 0.94 (0.54, 1.62)        | 1.21 (0.63, 2.35)       | 1.06 (0.63, 1.76)        | 0.92 (0.63, 1.37)        | 1 (0.55, 1.81)           | 1.41 (0.86, 2.36) | 1.16 (0.77, 1.71)       | 0.92 (0.53, 1.6)        | <b>1.5 (1.11, 2.05)</b>  |
| 1.01 (0.83, 1.24)        | <1%: plaCT+ICI           | 0.83 (0.52, 1.37)        | 1.08 (0.59, 2.01)       | 0.94 (0.61, 1.47)        | 0.82 (0.62, 1.11)        | 0.89 (0.52, 1.53)        | 1.26 (0.82, 1.97) | 1.03 (0.76, 1.38)       | 0.82 (0.5, 1.34)        | <b>1.34 (1.14, 1.6)</b>  |
| 1.01 (0.69, 1.44)        | <1%:<br>plaCT+niv+ipi    |                          | 1.3 (0.62, 2.74)        | 1.13 (0.61, 2.08)        | 0.99 (0.59, 1.67)        | 1.07 (0.53, 2.12)        | 1.51 (0.82, 2.79) | 1.24 (0.73, 2.06)       | 0.98 (0.51, 1.89)       | <b>1.61 (1.02, 2.54)</b> |
| 0.91 (0.6, 1.4)          |                          | 0.91 (0.56, 1.47)        | ≥50%: ICI               | 0.87 (0.58, 1.31)        | 0.76 (0.4, 1.43)         | 0.82 (0.38, 1.78)        | 1.17 (0.58, 2.38) | 0.96 (0.5, 1.78)        | 0.76 (0.36, 1.59)       | 1.24 (0.69, 2.23)        |
| 1.14 (0.82, 1.64)        | 1.14 (0.85, 1.52)        | 1.14 (0.75, 1.72)        | 1.25 (0.97, 1.61)       | ≥50%: niv+ipi            | 0.88 (0.55, 1.41)        | 0.94 (0.49, 1.82)        | 1.34 (0.75, 2.39) | 1.1 (0.67, 1.75)        | 0.87 (0.47, 1.61)       | 1.42 (0.95, 2.15)        |
| <b>1.73 (1.33, 2.25)</b> | <b>1.72 (1.41, 2.05)</b> | <b>1.73 (1.22, 2.41)</b> | <b>1.9 (1.26, 2.83)</b> | <b>1.51 (1.1, 2.07)</b>  | ≥50%:<br>plaCT+ICI       | 1.07 (0.6, 1.89)         | 1.53 (0.95, 2.45) | 1.25 (0.87, 1.75)       | 0.99 (0.59, 1.67)       | <b>1.62 (1.27, 2.08)</b> |
| 1.17 (0.73, 1.83)        | 1.16 (0.77, 1.73)        | 1.17 (0.7, 1.88)         | 1.28 (0.74, 2.16)       | 1.02 (0.63, 1.63)        | 0.68 (0.44, 1.03)        | ≥50%:<br>plaCT+niv+ipi   | 1.42 (0.74, 2.74) | 1.17 (0.65, 2.04)       | 0.92 (0.46, 1.85)       | 1.51 (0.9, 2.53)         |
| NA                       | NA                       | NA                       | NA                      | NA                       | NA                       | NA                       | 1-49%: niv+ipi    | 0.82 (0.5, 1.29)        | 0.65 (0.35, 1.19)       | 1.06 (0.71, 1.59)        |
| 1.19 (0.93, 1.53)        | <b>1.18 (1, 1.41)</b>    | 1.19 (0.84, 1.66)        | 1.3 (0.88, 1.94)        | 1.04 (0.78, 1.42)        | <b>0.69 (0.56, 0.86)</b> | 1.02 (0.67, 1.58)        | NA                | 1-49%:<br>plaCT+ICI     | 0.79 (0.47, 1.35)       | <b>1.3 (1.02, 1.68)</b>  |
| 1.03 (0.71, 1.52)        | 1.02 (0.73, 1.44)        | 1.03 (0.66, 1.6)         | 1.13 (0.69, 1.84)       | 0.9 (0.59, 1.37)         | <b>0.59 (0.42, 0.87)</b> | 0.88 (0.53, 1.51)        | NA                | 0.86 (0.61, 1.24)       | 1-49%:<br>plaCT+niv+ipi | <b>1.64 (1.03, 2.61)</b> |
| <b>0.71 (0.58, 0.88)</b> | <b>0.71 (0.64, 0.78)</b> | <b>0.71 (0.52, 0.96)</b> | 0.78 (0.54, 1.12)       | <b>0.62 (0.47, 0.82)</b> | <b>0.41 (0.35, 0.48)</b> | <b>0.61 (0.41, 0.91)</b> | NA                | <b>0.6 (0.52, 0.69)</b> | <b>0.69 (0.5, 0.95)</b> | plaCT                    |
