# Supplementary material
Source: publisher figshare collection journal article supplement (https://future-science-group.figshare.com/ndownloader/files/31592522)

A

## Overall survival

Compared with plaCT

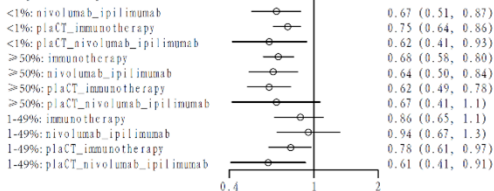

B

## Progression free survival

Compared with plaCT

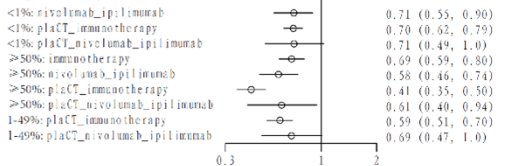

C

## Overall survival

Compared with chemotherapy

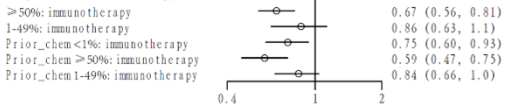

D

## Progression free survival

Compared with chemotherapy

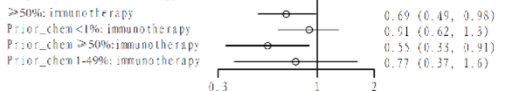

E

## Overall survival

Compared with ≥50%:nivolumab\_ipilimumab

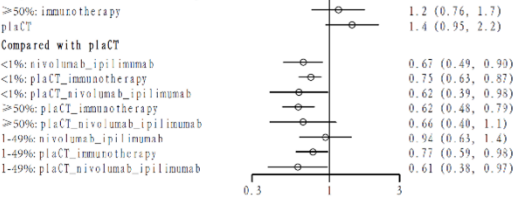

F

## Progression free survival

Compared with ≥50%:nivolumab\_ipilimumab

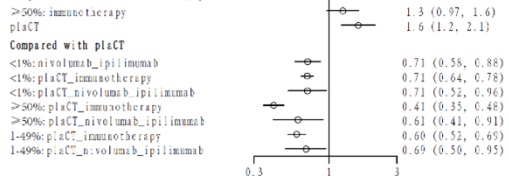

Supplement: Supplementary file 6 [file 31592522]
