# Supplementary material
Source: publisher figshare collection journal article supplement (https://future-science-group.figshare.com/ndownloader/files/31592522)
Supplement: Supplementary file 7 [file 31592522]

|   |                   |                   |                   |                   |                    |                   |                   |                  |                   |
|---|-------------------|-------------------|-------------------|-------------------|--------------------|-------------------|-------------------|------------------|-------------------|
| A | <1%: niv+ipi      | 1.09 (0.62, 1.79) | NA                | 1.2 (0.79, 1.81)  | 0.87 (0.44, 1.72)  | 0.93 (0.56, 1.57) | NA                | NA               | 1.4 (0.92, 2.14)  |
|   | 0.95 (0.68, 1.36) | <1%: plaCT+ate    | NA                | 1.1 (0.66, 1.95)  | 0.8 (0.44, 1.55)   | 0.85 (0.57, 1.38) | NA                | NA               | 1.29 (0.97, 1.85) |
|   | 0.92 (0.49, 1.7)  | <1%: plaCT+cam    | NA                | NA                | NA                 | NA                | NA                | NA               | NA                |
|   | 1.02 (0.78, 1.33) | 1.07 (0.77, 1.47) | 1.11 (0.61, 2.04) | <1%: plaCT+niv    | 0.72 (0.37, 1.44)  | 0.77 (0.47, 1.32) | NA                | NA               | 1.17 (0.77, 1.79) |
|   | 0.99 (0.62, 1.55) | 1.03 (0.66, 1.57) | 1.07 (0.55, 2.13) | 0.97 (0.61, 1.49) | <1%: plaCT+niv+ipi | 1.07 (0.58, 2)    | NA                | NA               | 1.62 (0.93, 2.77) |
|   | 1.01 (0.71, 1.43) | 1.06 (0.76, 1.42) | 1.1 (0.6, 2.01)   | 0.99 (0.71, 1.36) | 1.02 (0.66, 1.58)  | <1%: plaCT+pem    | NA                | NA               | 1.52 (1.11, 2.02) |
|   | 1.07 (0.58, 1.95) | 1.12 (0.62, 1.98) | 1.16 (0.53, 2.54) | 1.05 (0.58, 1.88) | 1.09 (0.56, 2.09)  | 1.06 (0.59, 1.91) | <1%: plaCT+sin    | NA               | NA                |
|   | 1.08 (0.59, 1.98) | 1.13 (0.63, 2.02) | 1.18 (0.54, 2.59) | 1.07 (0.59, 1.93) | 1.1 (0.57, 2.13)   | 1.08 (0.6, 1.93)  | 1.01 (0.48, 2.18) | <1%: plaCT+tis   | NA                |
|   | 0.7 (0.53, 0.92)  | 0.73 (0.58, 0.9)  | 0.76 (0.44, 1.33) | 0.69 (0.54, 0.86) | 0.71 (0.49, 1.03)  | 0.69 (0.56, 0.87) | 0.65 (0.38, 1.12) | 0.65 (0.37, 1.1) | plaCT             |

|   |                |                   |                   |                   |                   |                      |                   |                   |                   |                   |
|---|----------------|-------------------|-------------------|-------------------|-------------------|----------------------|-------------------|-------------------|-------------------|-------------------|
| B | 1-49%: niv+ipi | 0.91 (0.42, 1.82) | 0.98 (0.45, 1.96) | NA                | NA                | 0.65 (0.28, 1.53)    | 0.66 (0.31, 1.38) | NA                | NA                | 1.06 (0.59, 1.91) |
|   | NA             | 1-49%: pem        | 1.07 (0.58, 2.01) | NA                | NA                | 0.71 (0.34, 1.59)    | 0.73 (0.39, 1.41) | NA                | NA                | 1.17 (0.79, 1.87) |
|   | NA             | NA                | 1-49%: plaCT+ate  | NA                | NA                | 0.66 (0.32, 1.5)     | 0.67 (0.36, 1.33) | NA                | NA                | 1.09 (0.72, 1.78) |
|   | NA             | NA                | 1.07 (0.46, 2.45) | 1-49%: plaCT+cam  | NA                | NA                   | NA                | NA                | NA                | NA                |
|   | NA             | NA                | 1.06 (0.45, 2.42) | 0.99 (0.37, 2.68) | 1-49%: plaCT+niv  | NA                   | NA                | NA                | NA                | NA                |
|   | NA             | NA                | 0.96 (0.43, 2.12) | 0.89 (0.35, 2.32) | 0.91 (0.35, 2.38) | 1-49%: plaCT+niv+ipi | 1.02 (0.46, 2.2)  | NA                | NA                | 1.64 (0.88, 3.07) |
|   | NA             | NA                | 1.22 (0.62, 2.32) | 1.14 (0.48, 2.64) | 1.15 (0.49, 2.67) | 1.27 (0.56, 2.8)     | 1-49%: plaCT+pem  | NA                | NA                | 1.62 (1.02, 2.59) |
|   | NA             | NA                | 1.32 (0.52, 3.34) | 1.23 (0.42, 3.62) | 1.25 (0.43, 3.64) | 1.38 (0.49, 3.84)    | 1.08 (0.43, 2.79) | 1-49%: plaCT+sin  | NA                | NA                |
|   | NA             | NA                | 1.5 (0.56, 3.97)  | 1.4 (0.45, 4.28)  | 1.42 (0.46, 4.36) | 1.58 (0.53, 4.59)    | 1.24 (0.47, 3.35) | 1.14 (0.34, 3.73) | 1-49%: plaCT+tis  | NA                |
|   | NA             | NA                | 0.66 (0.41, 1.01) | 0.62 (0.31, 1.25) | 0.63 (0.31, 1.27) | 0.69 (0.36, 1.32)    | 0.54 (0.34, 0.87) | 0.5 (0.22, 1.14)  | 0.41 (0.18, 1.05) | plaCT             |

|   |                   |                   |                   |                   |                   |                   |                   |                     |                   |                   |                 |                   |
|---|-------------------|-------------------|-------------------|-------------------|-------------------|-------------------|-------------------|---------------------|-------------------|-------------------|-----------------|-------------------|
| C | ≥50%: cem         | 1.48 (0.9, 2.5)   | 1.25 (0.77, 2.04) | 1.15 (0.73, 1.77) | 1.09 (0.67, 1.79) | NA                | NA                | 1.16 (0.62, 2.14)   | 1.06 (0.63, 1.79) | NA                | NA              | 1.75 (1.18, 2.59) |
|   | 0.57 (0.21, 1.51) | ≥50%: niv         | 0.85 (0.63, 1.14) | 0.78 (0.52, 1.14) | 0.73 (0.47, 1.14) | NA                | NA                | 0.78 (0.44, 1.38)   | 0.71 (0.44, 1.17) | NA                | NA              | 1.18 (0.85, 1.63) |
|   | 0.79 (0.30, 2.10) | 1.37 (0.75, 2.58) | ≥50%: niv+ipi     | 0.91 (0.63, 1.31) | 0.87 (0.57, 1.31) | NA                | NA                | 0.93 (0.53, 1.61)   | 0.84 (0.53, 1.35) | NA                | NA              | 1.4 (1.03, 1.87)  |
|   | 0.83 (0.34, 2.12) | 1.45 (0.66, 3.39) | 1.05 (0.48, 2.45) | ≥50%: pem         | 0.95 (0.67, 1.37) | NA                | NA                | 1.01 (0.6, 1.71)    | 0.92 (0.61, 1.4)  | NA                | NA              | 1.53 (1.24, 1.89) |
|   | 1.17 (0.46, 3.08) | 2.03 (0.89, 4.9)  | 1.48 (0.64, 3.52) | 1.4 (0.63, 3.06)  | ≥50%: plaCT+ate   | NA                | NA                | 1.06 (0.59, 1.89)   | 0.97 (0.6, 1.56)  | NA                | NA              | 1.61 (1.2, 2.15)  |
|   | 1.37 (0.34, 5.61) | 2.4 (0.64, 9.22)  | 1.75 (0.46, 6.69) | 1.65 (0.45, 5.98) | 1.17 (0.32, 4.38) | ≥50%: plaCT+cam   | NA                | NA                  | NA                | NA                | NA              | NA                |
|   | 0.98 (0.32, 3.00) | 1.71 (0.62, 4.79) | 1.25 (0.45, 3.47) | 1.18 (0.44, 3.04) | 0.84 (0.31, 2.24) | 0.71 (0.17, 2.98) | ≥50%: plaCT+niv   | NA                  | NA                | NA                | NA              | NA                |
|   | 0.89 (0.30, 2.65) | 1.55 (0.58, 4.25) | 1.12 (0.42, 3.07) | 1.06 (0.4, 2.73)  | 0.76 (0.28, 2.01) | 0.64 (0.16, 2.65) | 0.91 (0.29, 2.8)  | ≥50%: plaCT+niv+ipi | 0.91 (0.51, 1.66) | NA                | NA              | 1.51 (0.94, 2.47) |
|   | 1.51 (0.59, 3.90) | 2.62 (1.13, 6.21) | 1.91 (0.83, 4.46) | 1.81 (0.82, 3.83) | 1.29 (0.56, 2.88) | 1.09 (0.29, 4.03) | 1.54 (0.57, 4.13) | 1.7 (0.64, 4.49)    | ≥50%: plaCT+pem   | NA                | NA              | 1.65 (1.15, 2.38) |
|   | 1.73 (0.58, 5.33) | 3.01 (1.1, 8.68)  | 2.2 (0.80, 6.20)  | 2.07 (0.78, 5.45) | 1.48 (0.54, 4.09) | 1.25 (0.30, 5.33) | 1.77 (0.56, 5.64) | 1.95 (0.64, 6.15)   | 1.15 (0.43, 3.11) | ≥50%: plaCT+sin   | NA              | NA                |
|   | 1.08 (0.34, 3.51) | 1.88 (0.64, 5.65) | 1.37 (0.46, 4.09) | 1.3 (0.45, 3.6)   | 0.92 (0.31, 2.68) | 0.78 (0.17, 3.44) | 1.1 (0.33, 3.68)  | 1.22 (0.37, 4.02)   | 0.72 (0.25, 2.07) | 0.62 (0.18, 2.08) | ≥50%: plaCT+tis | NA                |
|   | 0.54 (0.25, 1.16) | 0.94 (0.51, 1.78) | 0.69 (0.37, 1.27) | 0.65 (0.37, 1.08) | 0.46 (0.26, 0.82) | 0.39 (0.12, 1.28) | 0.55 (0.24, 1.25) | 0.61 (0.28, 1.35)   | 0.36 (0.20, 0.64) | 0.31 (0.14, 0.70) | 0.5 (0.2, 1.24) | plaCT             |
