# Supplementary material
Source: publisher figshare collection journal article supplement (https://future-science-group.figshare.com/ndownloader/files/31592522)

A

## Overall survival

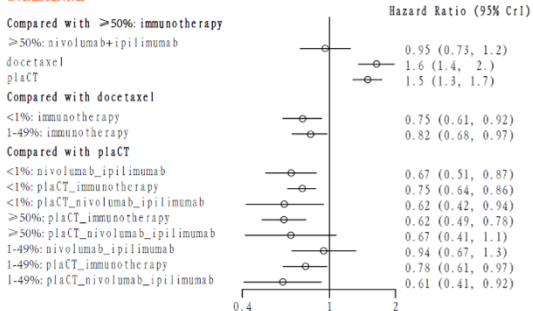

B

## Progression free survival

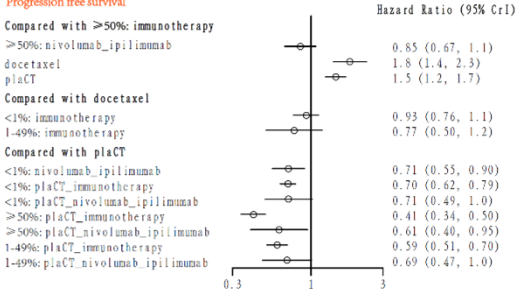

Supplement: Supplementary file 1 [file 31592522]

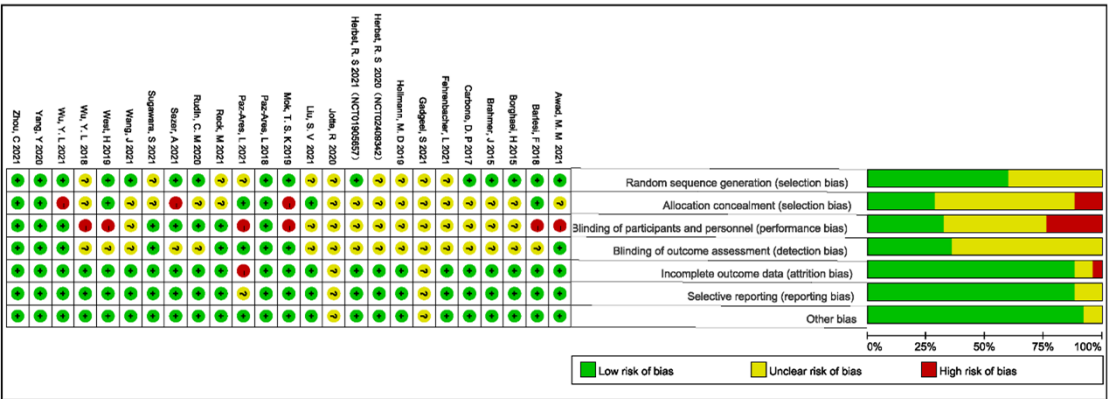

Supplement: Supplementary file 4 [file 31592522]

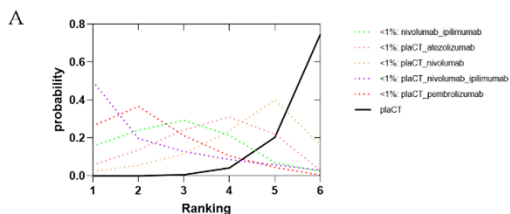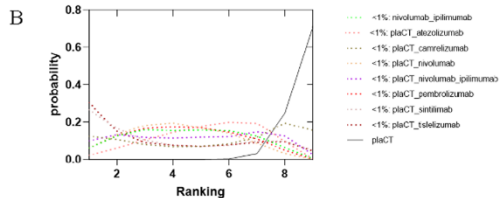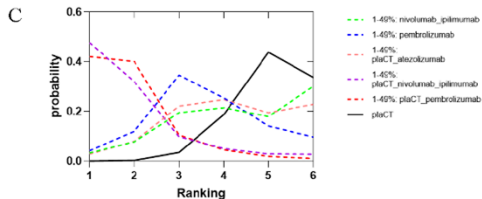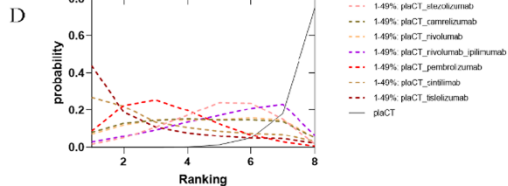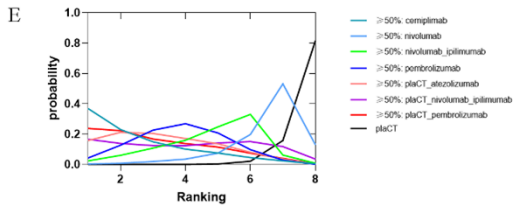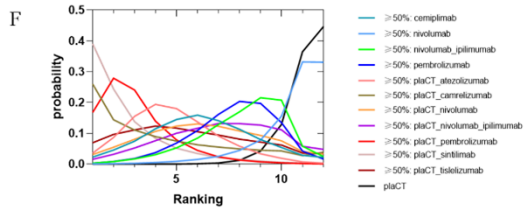

Supplement: Supplementary file 5 [file 31592522]
